# Supplementary material for: Molecular dynamics simulation of CO2-switchable surfactant regulated reversible emulsification/demulsification processes of a dodecane–saline system
Source: Royal Society of Chemistry journal article supplement (doi:10.1039/d0cp03904g), 2020-01-01
Supplement: d0cp03904g1.pdf [file d0cp03904g1.pdf]

# **Molecular Dynamics Simulation of CO<sub>2</sub>-switchable Surfactant Regulating Reversible Emulsification/Demulsification Processes of a Dodecane-Saline System<sup>†</sup>**

Lihu Zhang<sup>a</sup>, Xiancai Lu<sup>\*ab</sup>, Xiandong Liu<sup>a</sup>, Qin Li<sup>a</sup>, Yongxian Cheng<sup>a</sup>, Qingfeng Hou<sup>c</sup>

<sup>a</sup> State Key Laboratory for Ore Deposits Research, School of Earth Sciences and Engineering, Nanjing University, Nanjing Jiangsu, 210023, P. R. China

<sup>b</sup> Key Lab of Surficial Geochemistry of Ministry of Education, School of Earth Sciences and Engineering, Nanjing University, Nanjing Jiangsu, 210023, P. R. China

<sup>c</sup> State Key Laboratory of Enhanced Oil Recovery, Research Institute of Petroleum Exploration and Development, China National Petroleum Corporation (CNPC), Beijing 100083, People's Republic of China

\*Corresponding author:

Prof. Xiancai Lu, School of earth sciences and engineering, Nanjing University,  
Nanjing, Jiangsu Province, 210023, China

Email: xcljun@nju.edu.cn

Tel: 86-25-89681065

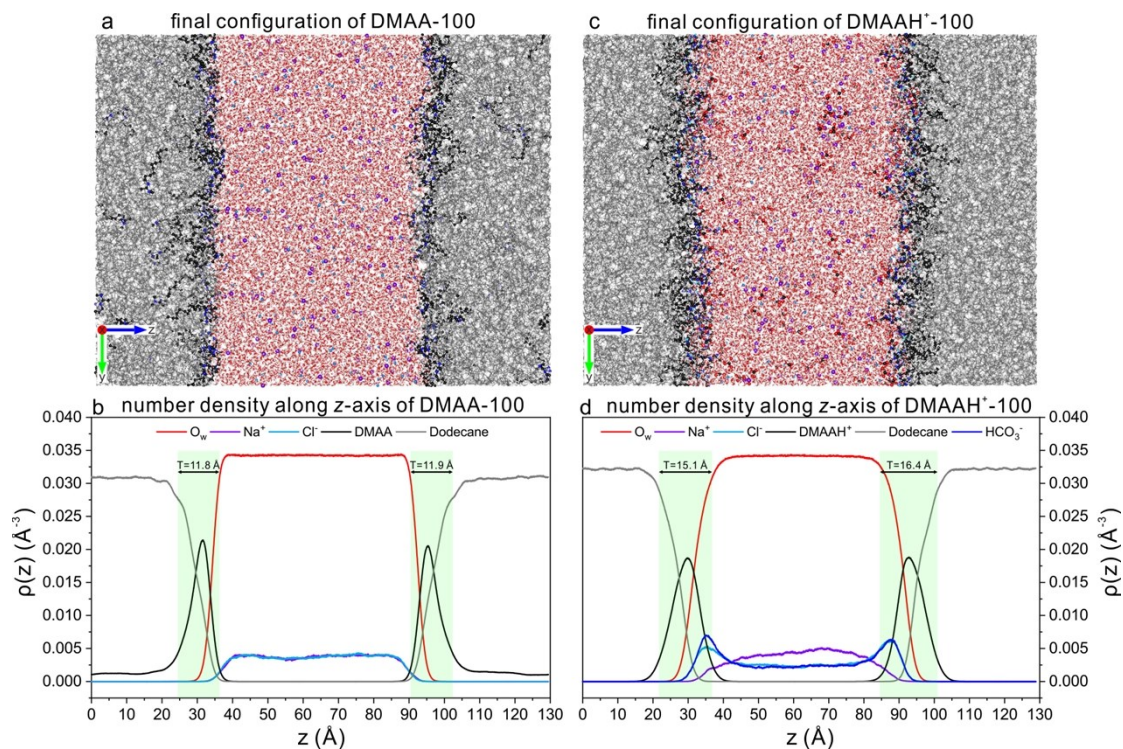

Figure S1. Equilibrated configurations (a and c) and number density profiles along  $z$ -axis (b and d) of model DMAA-100 and model DMAAH<sup>+</sup>-100.  $O_w$  denotes the O atom of water molecule. The density profiles of DMAA, DMAAH<sup>+</sup> and dodecane are calculated by using all atoms except hydrogen atoms. The density profiles of  $Na^+$  and  $Cl^-$  are magnified 10 times for the sake of clarity. The characterization of species in equilibrated configurations is same as that in Figure 1.

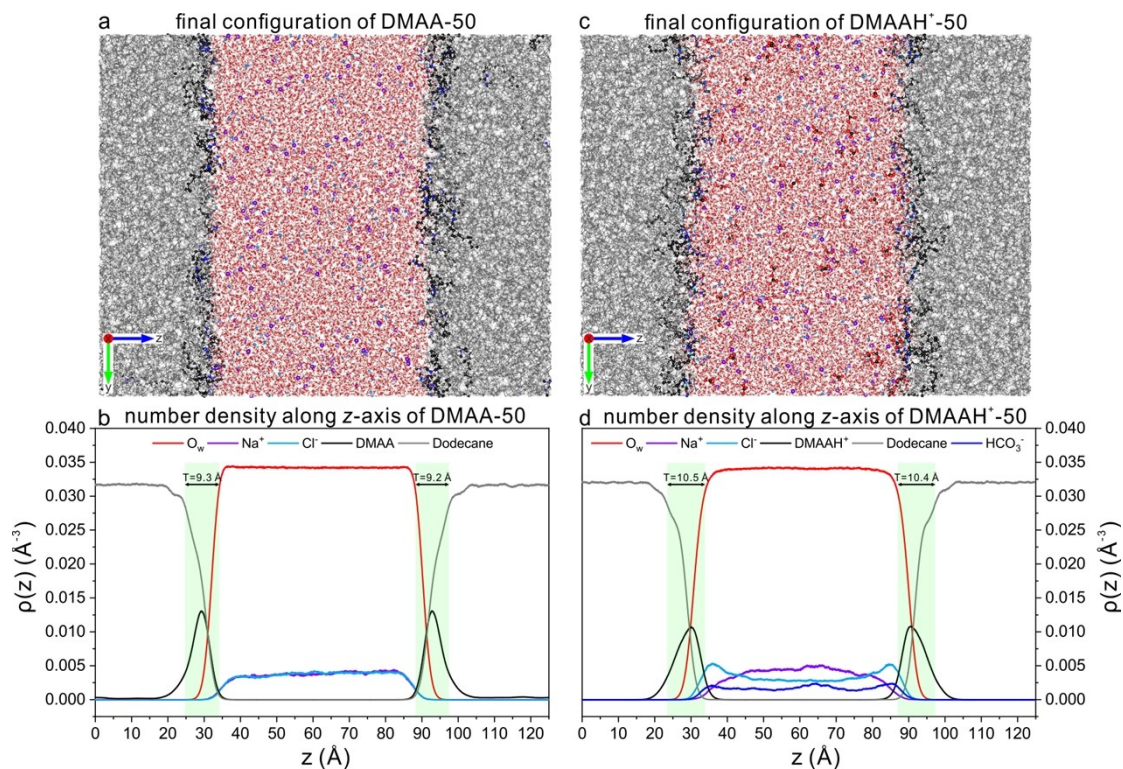

Figure S2. Equilibrated configurations (a and c) and number density profiles along  $z$ -axis (b and d) of model DMAA-50 and model DMAAH<sup>+</sup>-50.  $O_w$  denotes the O atom of water molecule. The density profiles of DMAA, DMAAH<sup>+</sup> and dodecane are calculated by using all atoms except hydrogen atoms. The density profiles of  $Na^+$  and  $Cl^-$  are magnified 10 times for the sake of clarity. The characterization of species in equilibrated configurations is same as that in Figure 1.

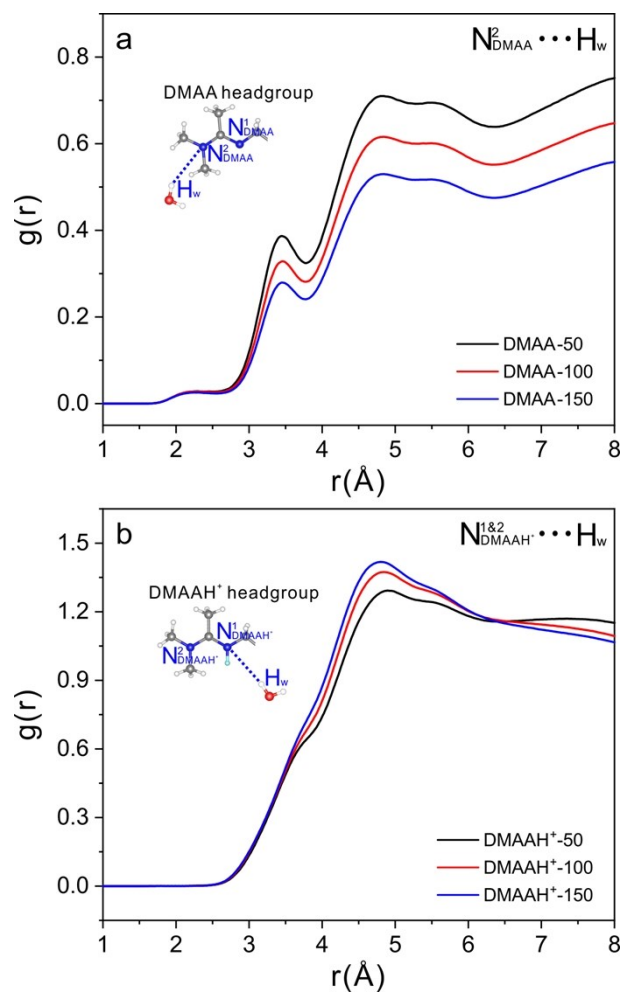

Figure S3. RDFs between the polar headgroup of DMAA/DMAAH<sup>+</sup> and water molecules. For DMAA, N1 DMAA and N2 DMAA denote the nitrogen atom connected with alkyl tail and dimethyl, respectively. N1 DMAAH<sup>+</sup> and N2 DMAAH<sup>+</sup> denote the corresponding nitrogen atoms in DMAAH<sup>+</sup>. H<sub>w</sub> represents the hydrogen atom in water molecule.
